# Supplementary material for: Toward a conceptual framework of health and its operational definition: an application in the 1958 British birth cohort
Source: Research Square preprint supplement (doi:10.21203/rs.3.rs-1754002/v1), 2022-09-13
Supplement: Supplementary file 1 [file aba934abaae95a42d6530b77.pdf]

Additional Figures

Additional Figure 1: Diagram of inclusion and exclusion criteria in the NCDS 58

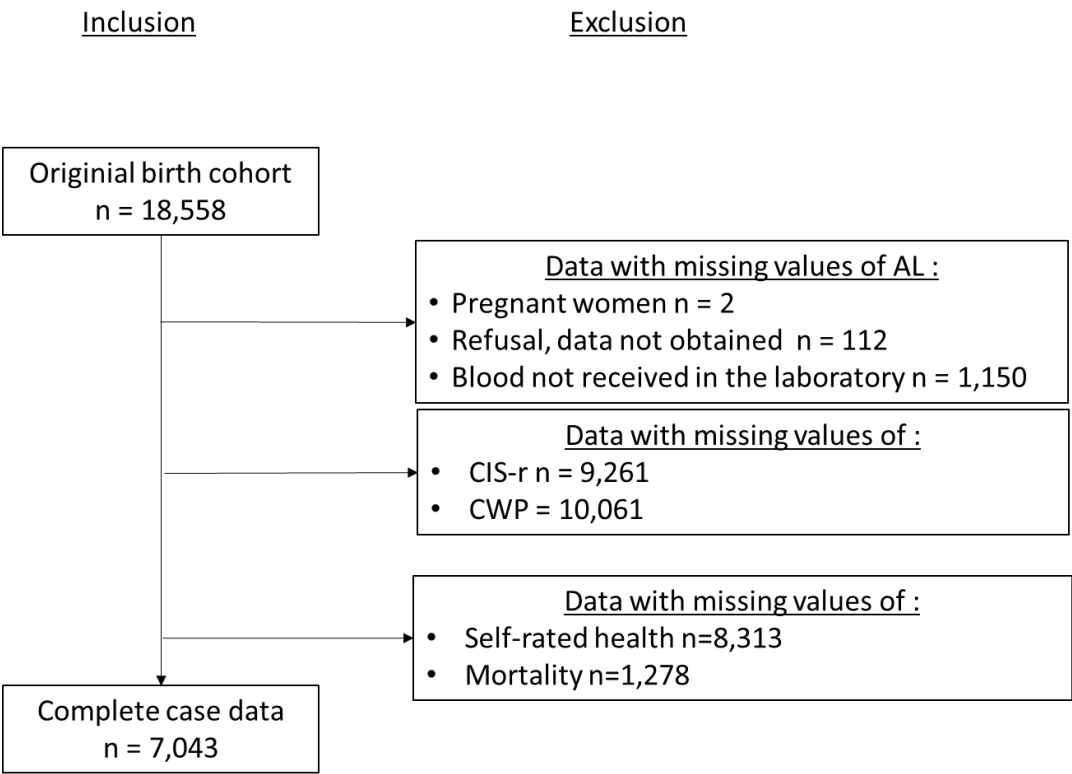

Additional Figure 2: Sex adjusted results of Logistic regressions of the indicators of deteriorating health reserves on self-rated health at ages 46, 50 and 55

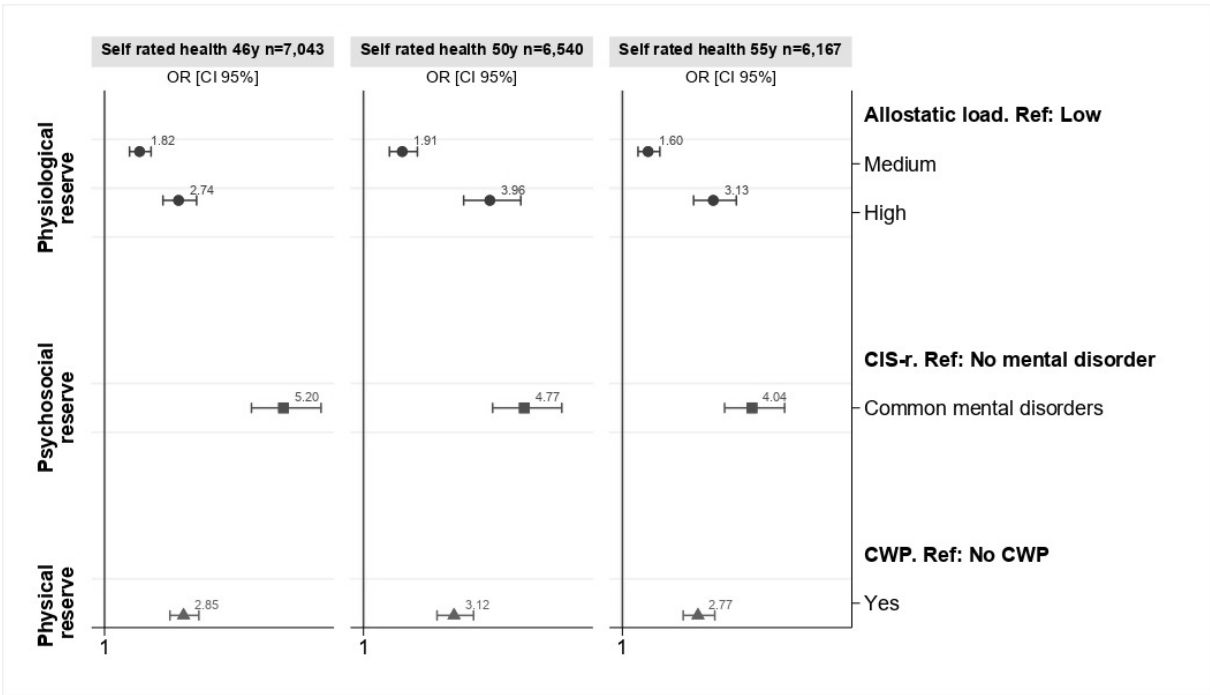

8 Additional File 1. Details on the construction of the Global Health Score variables n°2, 3 and 4

| Global health score | NCDS sweep                 | Variable                 | Level                                      | n(%)          | Details                                                                                                                                                                                                                                                                                                                                   |
|---------------------|----------------------------|--------------------------|--------------------------------------------|---------------|-------------------------------------------------------------------------------------------------------------------------------------------------------------------------------------------------------------------------------------------------------------------------------------------------------------------------------------------|
| n° 2                | Biomedical survey (44/45y) | CIS-r other categories   | No mental health problem                   | 8,658 (46.65) | We have categorised the CIS-r score variable in the same method as in a previous article(1)                                                                                                                                                                                                                                               |
|                     |                            |                          | Mental health problem requiring assessment | 438 (2.36)    |                                                                                                                                                                                                                                                                                                                                           |
|                     |                            |                          | Mental health problem requiring treatment  | 201 (1.08)    |                                                                                                                                                                                                                                                                                                                                           |
|                     |                            |                          | Missing                                    | 9,261 (49.90) |                                                                                                                                                                                                                                                                                                                                           |
| n° 3                | Biomedical survey (44/45y) | CIS-r tertiles           | [0]                                        | 3,381 (18.22) | We have categorised the CIS-r score variable using the tertiles of its distribution                                                                                                                                                                                                                                                       |
|                     |                            |                          | [1-4]                                      | 3,380 (18.21) |                                                                                                                                                                                                                                                                                                                                           |
|                     |                            |                          | [5-33]                                     | 2,536 (13.67) |                                                                                                                                                                                                                                                                                                                                           |
|                     |                            |                          | Missing                                    | 9,261 (49.90) |                                                                                                                                                                                                                                                                                                                                           |
| n° 4                | Sweep n°6 (42y)            | Pain at 42y              | None                                       | 8,834 (47.60) | Individuals were asked "Have you ever had or been told you had (i) persistent back pain lumbago or sciatica; (ii) chronic fatigue syndrome better known as ME" ; (iii) Neither of these". Those who responded "Persistent back pain/lumbago/sciatic" were assigned to one group while the others were assigned to the reference category. |
|                     |                            |                          | Persistent back pain/lumbago/sciatic       | 2,542 (13.70) |                                                                                                                                                                                                                                                                                                                                           |
|                     |                            |                          | Missing                                    | 7,182 (38.70) |                                                                                                                                                                                                                                                                                                                                           |
|                     |                            | Malaise inventory at 42y | Normal 0-7                                 | 9,767 (52.63) | Malaise is "a generalized feeling of discomfort, illness, uneasiness, fatigue or lack of well-being, often associated with a disease state" (2). We summed                                                                                                                                                                                |
|                     |                            |                          | Depressed 8-24                             | 1,494 (8.05)  |                                                                                                                                                                                                                                                                                                                                           |
|                     |                            |                          | Missing                                    | 7,297 (39.32) |                                                                                                                                                                                                                                                                                                                                           |

the binary malaise inventory variables to derive the malaise inventory score ranging from 0-24. Individuals responding 'yes' to eight or more of the 24 items are considered to be at risk of depression (3).

---

Total

18,558 (100)

---

9

## 10 References

11

- 12 1. Bebbington PE, McManus S. Revisiting the one in four: the prevalence of psychiatric disorder in the population of England 2000–2014. Br J Psychiatry.  
13 2020 Jan;216(1):55–7.
- 14 2. Scully C. 4 - Signs and symptoms. In: Scully C, editor. Scully's Medical Problems in Dentistry (Seventh Edition) [Internet]. Oxford: Churchill Livingstone;  
15 2014. p. 97–122. Available from: <https://www.sciencedirect.com/science/article/pii/B9780702054013000047>
- 16 3. Rodgers B, Pickles A, Power C, Collishaw S, Maughan B. Validity of the Malaise Inventory in general population samples. Soc Psychiatry Psychiatr  
17 Epidemiol. 1999 Jun 25;34(6):333–41.

18
